# Supplementary material
Source: PubMed Central journal article supplement (PMC3265362)
Supplement: NIHMS266512-supplement-S1.pdf [file NIHMS266512-supplement-S1.pdf]

SUPPLEMENTARY ONLINE DATA

**Kinetic, thermodynamic and X-ray structural insights into the interaction of melatonin and analogues with quinone reductase 2**

Barbara CALAMINI\*, Bernard D. SANTARSIERO\*, Jean A. BOUTIN† and Andrew D. MESECAR\*<sup>1</sup>

\*Center for Pharmaceutical Biotechnology and Department of Medicinal Chemistry and Pharmacognosy, College of Pharmacy, The University of Illinois at Chicago, 900 S. Ashland Ave M/C 870, Chicago, IL 60607, U.S.A., and †Pharmacologie Moléculaire et Cellulaire, Institut de Recherches Servier, 125 Chemin de Ronde, 78290 Croissy-sur-Seine, France

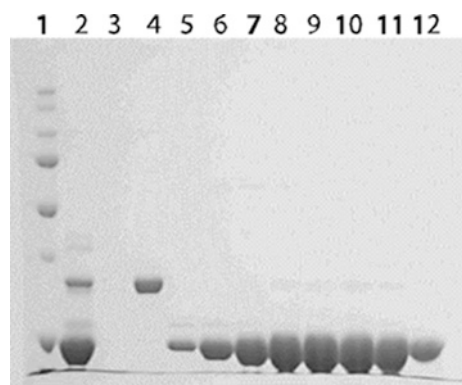

**Figure S1 SDS/PAGE gel for the last chromatographic step in the purification of untagged wild-type human QR2**

Lane 1, molecular-mass standards ladder; lane 2, Superdex pool; lanes 3 and 4, eluted impurities; lanes 5–12, eluted fractions of QR2.

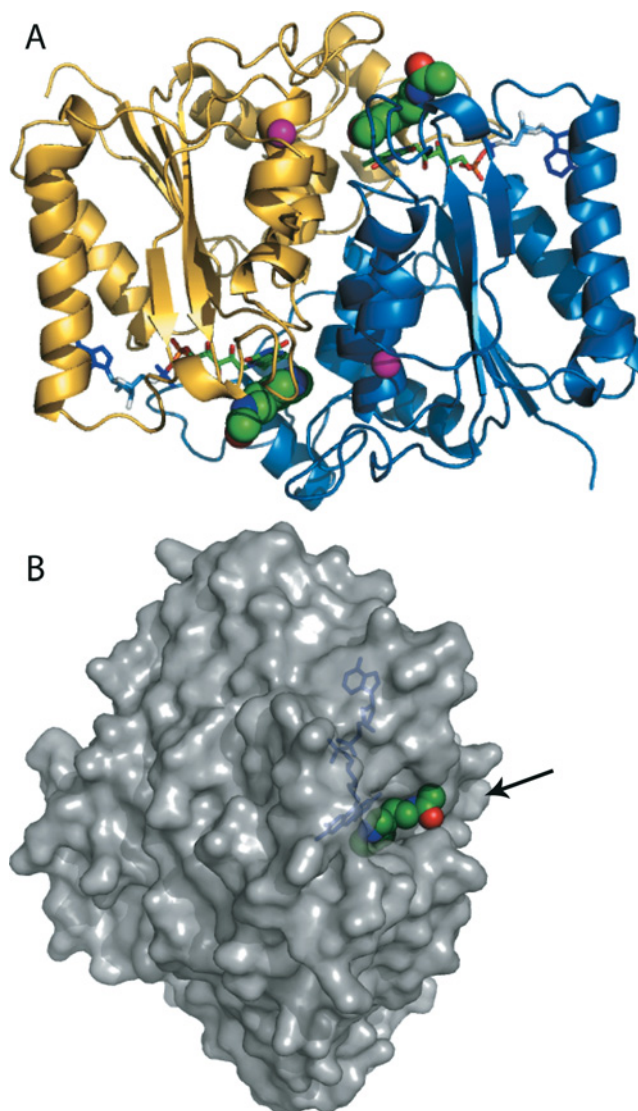

**Figure S2 Structure of QR2 complexed to melatonin**

(A) Ribbon diagram of the secondary structure of the protein; one monomer is coloured yellow, and the other is blue. FAD is shown as a stick diagram, and melatonin is shown in space-filling representation. The zinc atoms are coloured magenta. (B) Surface representation of QR2 (grey). The substrate-binding site shown by the arrow is exposed to the solvent. FAD (blue sticks) is shown in transparency.

<sup>1</sup> To whom correspondence should be addressed (email mesecar@uic.edu).

The atomic co-ordinates and structure factors have been deposited in the Protein Data Bank under codes 2QWX, 2QX4 and 2QX6 for the QR2 (quinone reductase 2)–melatonin complex, and 2QX8 and 2QX9 for the QR2–2-iodomelatonin complex.

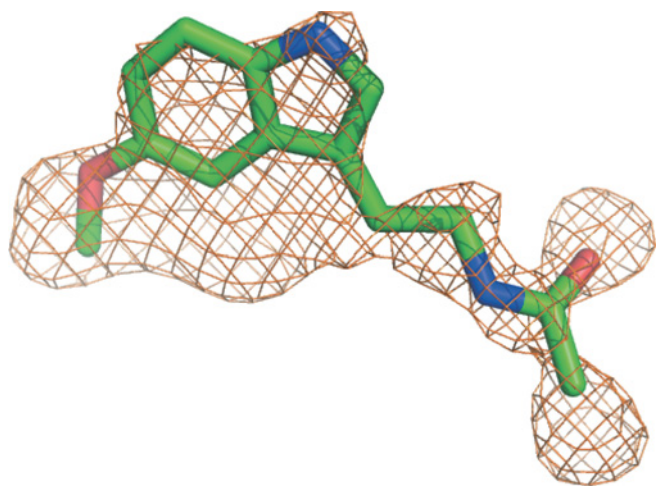

**Figure S3** Representative difference electron-density map of melatonin in the active site (site 1) of one monomer

Density is contoured at the  $3\sigma$  level.

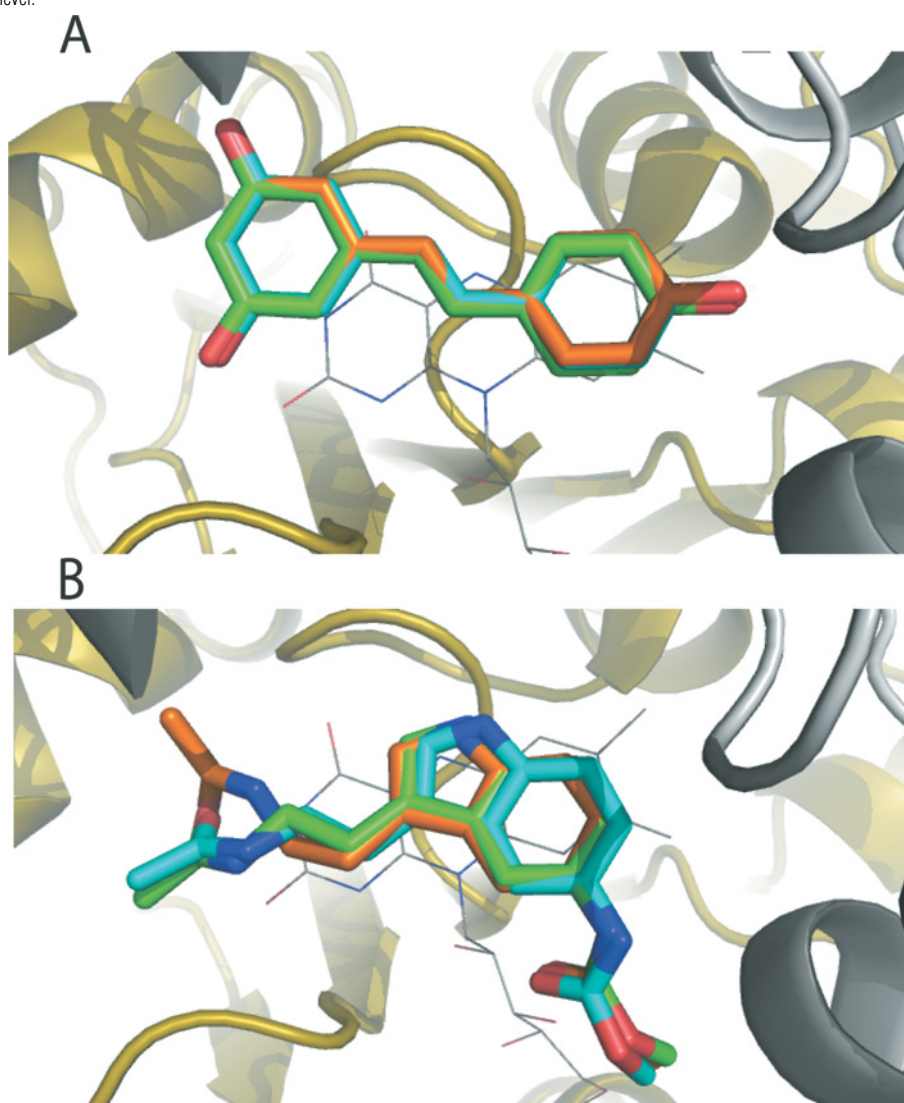

**Figure S4** Results of the docking of resveratrol and MCA-NAT inside the QR2 active site

Docking solutions were generated using GOLD for resveratrol (A) and MCA-NAT (B).

**Table S1 X-ray data collection and refinement statistics**

$R_{\text{merge}} = \Sigma(I - \langle I \rangle) / \Sigma(I)$ .  $R_{\text{cryst}} = \Sigma |F_{\text{obs}}| - k |F_{\text{calc}}| / \Sigma |F_{\text{obs}}|$ .  $R_{\text{free}}$  is the  $R_{\text{cryst}}$  value for 5% of the reflections excluded from the refinement. RMSD (root mean square deviation) was calculated with Procheck (<http://www.biochem.ucl.ac.uk/~roman/procheck/procheck.html>). Values in parentheses indicate the highest-resolution shell.

|                                   | QR2-melatonin 1                               | QR2-melatonin 2                               | QR2-melatonin 3                               | QR2-iodomelatonin 1                           | QR2-iodomelatonin 2                           |
|-----------------------------------|-----------------------------------------------|-----------------------------------------------|-----------------------------------------------|-----------------------------------------------|-----------------------------------------------|
| <b>Data collection</b>            |                                               |                                               |                                               |                                               |                                               |
| Space group                       | P2 <sub>1</sub> 2 <sub>1</sub> 2 <sub>1</sub> |
| Unit cell (Å):                    |                                               |                                               |                                               |                                               |                                               |
| <i>a</i>                          | 56.635                                        | 56.576                                        | 56.530                                        | 56.595                                        | 56.595                                        |
| <i>b</i>                          | 83.549                                        | 83.621                                        | 83.617                                        | 83.323                                        | 81.528                                        |
| <i>c</i>                          | 106.352                                       | 106.492                                       | 106.274                                       | 106.213                                       | 106.178                                       |
| $\alpha, \beta, \gamma$ (°)       | 90                                            | 90                                            | 90                                            | 90                                            | 90                                            |
| Resolution (Å)                    | 20–1.47                                       | 20–1.65                                       | 20–1.75                                       | 20–1.6                                        | 20–2.3                                        |
| Total no. of observations         | 393 693                                       | 112 803                                       | 185 420                                       | 960 426                                       | 118 827                                       |
| No. of averaged observations      | 84 189                                        | 59 983                                        | 91 839                                        | 136 944                                       | 22 987                                        |
| $R_{\text{merge}}$ (%)            | 6.6 (57.4)                                    | 7.3 (83.7)                                    | 7.2 (63.2)                                    | 9.1 (78.7)                                    | 20.3 (75.2)                                   |
| $\chi^2$                          | 1.56                                          | 1.80                                          | 1.00                                          | 1.02                                          | 1.01                                          |
| $I/\sigma I$                      | 29.8 (2.3)                                    | 31.3 (1.71)                                   | 8.62 (1.2)                                    | 13.9 (1.6)                                    | 7.10 (2.91)                                   |
| Completeness (%)                  | 97.9 (91.9)                                   | 97.8 (99.1)                                   | 93.5 (71.5)                                   | 98.3 (92.1)                                   | 99.0 (99.9)                                   |
| <b>Refinement</b>                 |                                               |                                               |                                               |                                               |                                               |
| Resolution range (Å)              | 20–1.50                                       | 20–1.65                                       | 20–1.75                                       | 20–1.6                                        | 20–2.3                                        |
| No. of reflections in working set | 76 077                                        | 56 904                                        | 47 614                                        | 63 699                                        | 18 872                                        |
| No. of reflections in test set    | 4059                                          | 3017                                          | 2506                                          | 2690                                          | 959                                           |
| $R_{\text{cryst}}$ (%)            | 19.2                                          | 18.6                                          | 19.2                                          | 21.1                                          | 21.4                                          |
| $R_{\text{free}}$ (%)             | 21.3                                          | 21.8                                          | 22.0                                          | 23.5                                          | 28.5                                          |
| Figure of merit                   | 0.865                                         | 0.859                                         | 0.862                                         | 0.868                                         | 0.770                                         |
| <i>B</i> factor (Å <sup>2</sup> ) | 25.4                                          | 33.8                                          | 27.1                                          | 24.8                                          | 54.9                                          |
| <b>RMSD</b>                       |                                               |                                               |                                               |                                               |                                               |
| Bond length (Å)                   | 0.013                                         | 0.012                                         | 0.019                                         | 0.014                                         | 0.009                                         |
| Bond angle (°)                    | 1.61                                          | 1.52                                          | 1.40                                          | 1.61                                          | 1.40                                          |
| Dihedral angle (°)                | 22.0                                          | 21.9                                          | 22.3                                          | 21.8                                          | 21.5                                          |
| Improper angle (°)                | 1.13                                          | 1.04                                          | 0.99                                          | 1.14                                          | 0.90                                          |
| <b>Ramachandran plot (%)</b>      |                                               |                                               |                                               |                                               |                                               |
| Most favoured                     | 96.1                                          | 91.2                                          | 90.1                                          | 96.7                                          | 87.2                                          |
| Allowed                           | 3.9                                           | 8.8                                           | 9.9                                           | 3.3                                           | 12.3                                          |
| Disallowed                        | 0                                             | 0                                             | 0                                             | 0                                             | 0.5                                           |

**Table S2 Comparison of the steady-state inhibition kinetic parameters of QR2 using SigmaPlot 9.0**

AICc, corrected Akaike information criterion.

(a) Inhibition of QR2 by melatonin with constant menadione and various NMeH concentrations

| Parameter                 | Competitive | Non-competitive | Uncompetitive |
|---------------------------|-------------|-----------------|---------------|
| $V_{\text{max}}$ (μM/min) | 41.8 ± 2.2  | 47.7 ± 3.4      | 47.0 ± 4.3    |
| $K_{\text{m}}$ (μM)       | 6.2 ± 2.3   | 14.6 ± 4.1      | 14.4 ± 5.4    |
| $K_{\text{i}}$ (μM)       | 7.2 ± 2.4   | 85.0 ± 11.9     | 68.5 ± 12.3   |
| $R^2$                     | 0.93        | 0.87            | 0.83          |
| Test                      | Pass        | Pass            | Pass          |
| Convergence               | Yes         | Yes             | Yes           |
| AICc                      | 108.5       | 128.6           | 140.8         |

(b) Inhibition of QR2 by melatonin with constant NMeH and various menadione concentrations

| Parameter                 | Competitive | Non-competitive | Uncompetitive |
|---------------------------|-------------|-----------------|---------------|
| $V_{\text{max}}$ (μM/min) | 49.9 ± 2.8  | 52.8 ± 1.5      | 57.5 ± 1.6    |
| $K_{\text{m}}$ (μM)       | 15.7 ± 3.3  | 17.6 ± 1.6      | 23.2 ± 1.9    |
| $K_{\text{i}}$ (μM)       | 34.0 ± 6.3  | 142.6 ± 7.5     | 91.6 ± 4.6    |
| $r^2$                     | 0.86        | 0.96            | 0.97          |
| Test                      | Fail        | Pass            | Pass          |
| Convergence               | Yes         | Yes             | Yes           |
| AICc                      | 190.2       | 116.3           | 97.3          |
